# Supplementary material for: Identification of Ellagic Acid from Plant Rhodiola rosea L. as an Anti-Ebola Virus Entry Inhibitor
Source: PubMed Central journal article supplement (PMC5923446; doi:10.3390/v10040152), 2018-03-27
Supplement: viruses-10-00152-s001.pdf [file viruses-10-00152-s001.pdf]

# Supplementary Materials: Identification of Ellagic Acid from Plant *Rhodiola rosea* L. as an Anti-Ebola Virus Entry Inhibitor

**Table S1.** IC<sub>50</sub>/CC<sub>50</sub> Values, 95% Confidence Intervals (CIs) and Selectivity indices (SIs) for Figure 3b–d.

|              | EBOV IC <sub>50</sub><br>( $\mu$ M) | 95% CI<br>( $\mu$ M) | MARV IC <sub>50</sub><br>( $\mu$ M) | 95% CI<br>( $\mu$ M) | CC <sub>50</sub><br>( $\mu$ M) | 95% CI<br>( $\mu$ M) | EBOV<br>SI | MARV<br>SI |
|--------------|-------------------------------------|----------------------|-------------------------------------|----------------------|--------------------------------|----------------------|------------|------------|
| Ellagic acid | 1.44                                | 1.19–1.75            | 6.38                                | 5.44–7.47            | 121.6                          | 101.8–145.3          | 84         | 19         |
| Gallic acid  | 4.73                                | 3.76–5.95            | 22.8                                | 15.9–32.7            | 308.7                          | 236.3–403.3          | 65         | 14         |

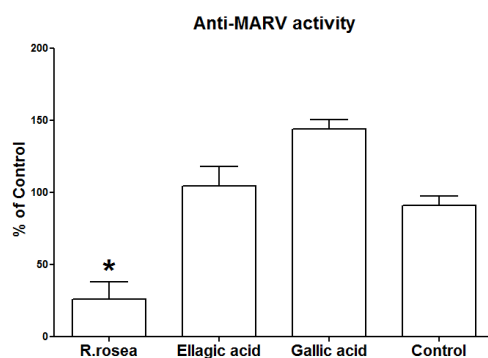

**Figure S1.** Anti-filovirus activities of *R. rosea* extract, ellagic acid and gallic acid against infectious MARV entry. *R. rosea* extract, ellagic acid and gallic acid were tested against infectious MARV infection at 25  $\mu$ g/mL, 25  $\mu$ M, and 25  $\mu$ M respectively. The result was normalized by DMSO vehicle control and shown (means  $\pm$  SD (n=2)). \*  $P < 0.05$ , *R. rosea* compared to control (untreated) group.
